# Supplementary material for: Adsorption of sulfamethoxazole (SMZ) and ciprofloxacin (CIP) by humic acid (HA): characteristics and mechanism
Source: Royal Society of Chemistry journal article supplement (doi:10.1039/c7ra06231a), 2017-01-01
Supplement: c7ra06231a1.pdf [file c7ra06231a1.pdf]

**Supplemental Information for**  
**Adsorption of sulfamethoxazole (SMZ) and ciprofloxacin (CIP)**  
**by humic acid (HA) : Characteristics and mechanism?**

Xiaohui Liu<sup>1,2</sup>, Shaoyong Lu<sup>2\*</sup>, Ying Liu<sup>3</sup>, Wei Meng<sup>1,2</sup>, Binghui Zheng<sup>2</sup>

1 School of Environment, Tsinghua University, Beijing 100084, China.

2 Dongtinghu Lake Ecological Observation and Research Station (DEORS), Chinese Research Academy of Environmental Sciences, Beijing 100012, China.

3 College of Geography and Environment, Shandong Normal University, Jinan 250358, PR China

\*Corresponding author

Shaoyong Lu Phone: +86-10-84935064

E-mail: lushy2000@163.com;

Fig.S1 The mole fraction of cationic (diamonds), neutral (squares), and anionic (triangles) forms of CIP as a function of pH. pKa values are from Carabineiro. et al. (2012).

Fig.S2 The mole fraction of cationic (diamonds), neutral (squares), and anionic (triangles) forms of SMZ as a function of pH. pKa values are from Fukahori. et al (2011).

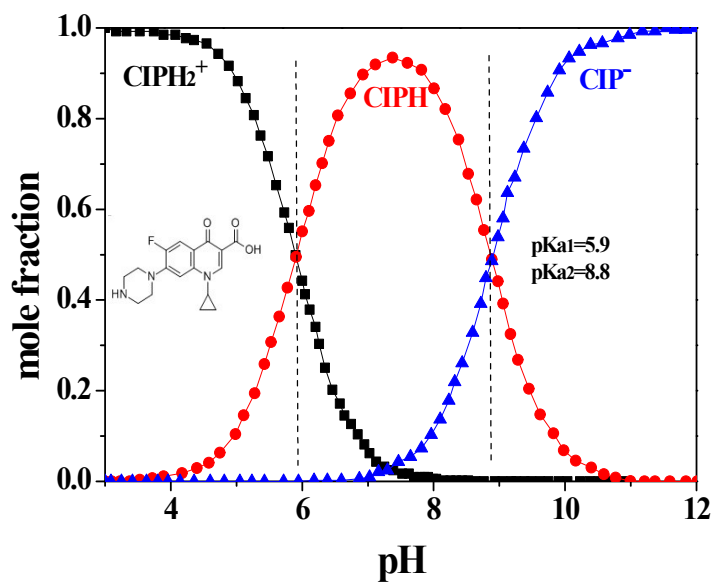

Fig.S1 The mole fraction of cationic (diamonds), neutral (squares), and anionic (triangles) forms of CIP as a function of pH. pKa values are from Carabineiro. et al. (2012).

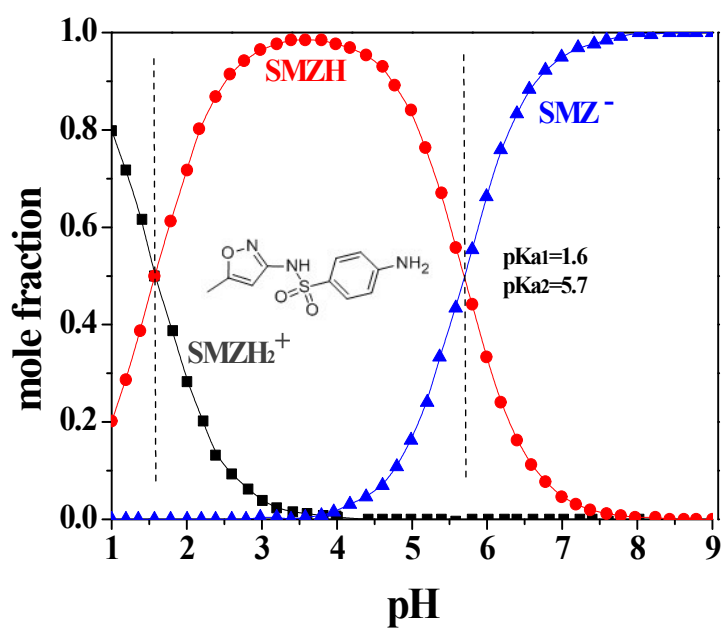

Fig.S2 The mole fraction of cationic (diamonds), neutral (squares), and anionic (triangles) forms of SMZ as a function of pH. pKa values are from Fukahori. et al (2011).
